1 Broad applicability of a streamlined Ethyl Cinnamate-based clearing procedure.

2

3 Wouter Masselink<sup>1\*</sup>, Daniel Reumann<sup>2\*</sup>, Prayag Murawala<sup>1</sup>, Pawel Pasierbek<sup>2</sup>, Yuka

4 Taniguchi<sup>1</sup>, Jürgen A. Knoblich<sup>2</sup>, Elly M. Tanaka<sup>1</sup>

5

6 1. Research Institute of Molecular Pathology (IMP), Vienna Biocenter (VBC), Campus-

7 Vienna-BioCenter 1, 1030 Vienna, Austria.

8 2. Institute of Molecular Biotechnology of the Austrian Academy of Sciences (IMBA),

9 Vienna BioCenter (VBC), Dr. Bohr-Gasse 3, 1030 Vienna, Austria.

10 \* These authors contributed equally to this work.

11

12

13 Key words

14 Tissue clearing, non-toxic, cerebral organoids, drosophila, axolotl, xenopus, zebrafish.

## 15 **Summary statement**

16 The non-toxic, broadly applicable, and simplified protocol of 2Eci tissue clearing makes it  
17 possible for non-specialist labs to use clearing approaches on conventional inverted  
18 microscopes.

19

## 20 **Abstract**

21 Turbidity and opacity are inherent properties of tissues which limit the capacity to  
22 acquire microscopic images through large tissues. Creating a uniform refractive index,  
23 known as tissue clearing, overcomes most of these issues. These methods have enabled  
24 researchers to image large and complex 3D structures with unprecedented depth and  
25 resolution. However, tissue clearing has been adopted to a limited extent due to a  
26 combination of cost, time, complexity of existing methods and potential negative impact on  
27 fluorescence signal. Here we describe 2Eci (2<sup>nd</sup> generation Ethyl cinnamate based clearing  
28 method) which can be used to clear a wide range of tissues, including cerebral organoids,  
29 *Drosophila melanogaster*, zebrafish, axolotl, and *Xenopus laevis* in as little as 1-5 days while  
30 preserving a broad range of fluorescence proteins including GFP, mCherry, Brainbow, and  
31 alexa-fluorophores. Ethyl cinnamate is non-toxic and can easily be used in multi-user  
32 microscope facilities. This method will open up clearing to a much broader group of  
33 researchers, due to its broad applicability, ease of use, and non-toxic nature of Ethyl  
34 cinnamate.

35

## 36 **Introduction**

37 Methods to optically clear tissues using refractive index matching have been transformative  
38 for imaging large, 3-dimensional tissues. Such methods have allowed long-distance  
39 mapping of axonal projections and reconstruction of entire embryos (Belle *et al.*, 2014;  
40 Economo *et al.*, 2016; Belle *et al.*, 2017). Despite the importance of these methods, the  
41 widespread, daily use of clearing agents to quantify cell populations in whole-mount  
42 preparations has seen limited use in rapidly evolving fields such as developmental biology,  
43 organoid research or regeneration biology due to cumbersome aspects associated with each  
44 method. Aqueous-based clearing media such as Clarity and SeeDB, require long incubation  
45 times for equilibration and immunostaining typically requiring days to weeks to complete  
46 depending on tissue size (see Table 1). This becomes prohibitive for rapidly screening

47 different experimental conditions. Organic-solvent based methods bypass long incubations  
48 times due to extraction of lipids and other organic material in the sample, yet are often  
49 either toxic, show limited clearing or reduced preservation of fluorescence protein signal  
50 (See Table 1). We aimed to overcome these shortcomings to produce a rapid, yet effective  
51 and non-toxic clearing protocol that preserves fluorescent protein/antibody signal. Such a  
52 method would allow, for example, the use of whole-mount organoid imaging for genetic or  
53 chemical screening. The method would also allow for interrogation of fluorescent protein-  
54 expressing transgenic animals combined with immunofluorescence to quantify/characterize  
55 discrete populations in complex samples such as an adult fly or regenerating axolotl limbs.  
56 Here we describe the combination of sample dehydration in 1-propanol<sub>pH9</sub> followed by  
57 refractive index matching with the organic compound ethyl cinnamate (Ethyl 3-phenyl-2-  
58 propenoate) as an ideal protocol for rapid, non-toxic sample preparation that preserves  
59 protein and labeled-antibody fluorescence which we call 2Eci (2<sup>nd</sup> generation Ethyl  
60 cinnamate based clearing method). We apply the 2Eci method to cerebral organoid  
61 characterization, whole-animal and whole-appendage imaging.

62

## 63 **Results and Discussion**

64

### 65 **Establishment of clearing conditions**

66 Our aim was to develop a rapid clearing protocol that preserves GFP fluorescence. We  
67 therefore focused on organic-chemical based protocols for their rapidity, and aimed to  
68 optimize efficiency of clearing and preservation of fluorescence signal. We assessed  
69 clearing efficiency and preservation of GFP fluorescence using cerebral organoids sparsely  
70 labeled with a population of CAG:GFP<sup>+</sup> expressing cells. Human cerebral organoids are a  
71 powerful 3D culture system that reconstitutes the early development of discrete brain  
72 regions(Lancaster *et al.*, 2013). These organoids provide a reductionist approach to  
73 understand aspects of human brain development in-vitro (Bagley *et al.*, 2017). Uncleared  
74 cerebral organoids are highly turbid (Fig. 1A). While FluoClearBABB (Fig. 1B) provides  
75 moderate improvement in turbidity, ethanol dehydration followed by refractive index  
76 matching using ethyl cinnamate as previously described (Klingberg *et al.*, 2017) cleared  
77 cerebral organoids (Fig. 1C). However, GFP fluorescence intensity, while still present, was  
78 significantly reduced resulting in the loss of ability to detect detailed cellular morphology

79 (Fig. 1E). Based on reports that dehydration using alcohols adjusted to alkaline pH levels can  
80 preserve GFP fluorescence (Schwarz *et al.*, 2015) we assessed clearing efficiency and GFP  
81 preservation in a series of alcohols adjusted to pH9 (Fig. 1D-H). We found that dehydration  
82 using methanol<sub>pH9</sub> and ethanol<sub>pH9</sub>, reduced fluorescent signal to approximately 1% and 5% of  
83 uncleared signal, so that morphological details of GFP<sup>+</sup> cells could no longer be observed  
84 (Fig. 1D-F, I). Cerebral organoids dehydrated with either 4-butanol<sub>pH9</sub> or 1-propanol<sub>pH9</sub>  
85 displayed a higher intensity of GFP signal at approximately 50% and 75% of uncleared signal  
86 (Fig. 1G-H, I). To assess clearing efficiency, we examined imaging depth independent of GFP  
87 fluorescence by recording auto-fluorescence levels at 488 nm wavelength. We found that  
88 total autofluorescence levels are comparable across dehydrating agents although increased  
89 compared to unfixed control samples (Fig. S1A). Methanol<sub>pH9</sub>, ethanol<sub>pH9</sub>, and 1-propanol<sub>pH9</sub>  
90 allow for autofluorescence recordings through the whole organoid (>1400 μm), while 4-  
91 butanol<sub>pH9</sub> mediated clearing yielded only 500 μm penetration into the organoid (Fig. 1J).  
92 We conclude that the combination of 1-propanol<sub>pH9</sub>-mediated dehydration followed by  
93 Ethyl cinnamate mediated refractive index matching allows for efficient clearing while  
94 preserving sufficient levels of GFP and can be completed in as little as 25 hours (Fig. 1K-M).  
95 We call this method 2Eci (2<sup>nd</sup> generation Ethyl cinnamate mediated clearing).

96

97 To further validate 2Eci as an efficient method to clear cerebral organoids we recorded z-  
98 stacks through >100 days old cerebral organoids sparsely labeled with a population of  
99 CAG:GFP<sup>+</sup>-expressing cells. We found that 2Eci clearing allows for recordings throughout  
100 organoids of approximately 1400 μm thick (Fig. 2A, Movie 1), while the recording depth of  
101 uncleared cerebral organoids was approximately 100 μm into the tissue (Fig. 2B). Not only is  
102 imaging through an entire cerebral organoid possible, detailed morphological structures can  
103 be observed. In 80 day old cleared cerebral organoids, neural rosettes were readily  
104 observable in toto, with more mature neurons showing elaborate morphology engulfing the  
105 neuronal rosette (Fig. 2C). As with all dehydration-based methods, the organoids underwent  
106 a 30-40% reduction in diameter (Ertürk *et al.*, 2012) (Fig. S1B), but highly detailed  
107 morphological structures such as putative dendrites with dendritic spines and putative  
108 axons with boutons could still be observed (Fig. 2D-F). To examine whether GFP  
109 fluorescence is equally preserved throughout the organoid we whole mount labelled  
110 cerebral organoids with αGFP647 nanobody. We found consistent colocalization of GFP<sup>+</sup>

111 cells and the and the  $\alpha$ GFP647 nanobody signal throughout the organoid (Fig. 2G-I, Fig.  
112 S1C). Taken together these data show that 2Eci is a viable method of clearing cerebral  
113 organoids and allows for detection of GFP signal within detailed morphological structures  
114 throughout the organoid.

115

116 Any method that is to be used in a high-throughput approach should take cost and  
117 robustness into account. In order to interrogate the robustness of 2Eci while also  
118 significantly reducing cost, we interrogated the clearing efficiency of 2Eci in a large variety  
119 of different organisms and substituted the original 99% Ethyl cinnamate for the up to seven-  
120 fold cheaper 98% ethyl cinnamate. We first attempted to clear the hindlimb of a CAG:EGFP-  
121 expressing transgenic *Xenopus laevis*. The CAG:GFP transgene is ubiquitously expressed with  
122 highest levels of expression in the musculature. The hindlimb is a thick tissue but after  
123 removal of the pigmented skin the limbs could be cleared using Ethyl cinnamate so that the  
124 ubiquitous GFP fluorescence was observed throughout the limb (Fig. 3A-C, Movie 2).

125

126 To further interrogate the effectiveness of 2Eci we explored alternative fluorophores  
127 beyond GFP. Using a newly established *Prrx1:ER-Cre-ER; CAGGs:LP-GFP-LP-mCherry* double  
128 transgenic axolotl we used tamoxifen to induce recombination of the *CAGGs:LP-GFP-LP-*  
129 *mCherry* cassette. Recombination during larval and limb bud stages results in an indelible  
130 mCherry labelling of connective tissues throughout the limb (Logan *et al.*, 2002). These limbs  
131 can be efficiently cleared using 2Eci, resulting in the preservation of both GFP and mCherry  
132 signal (Fig. 3D-F), which can be observed throughout the entire depth of the limb (Fig. 3F').

133 To further explore fluorophore survival upon clearing we investigated the potential of 2Eci  
134 in clearing Brainbow tissue. While the recent development of antigen specific fluorophores  
135 in Brainbow3 allows for antibody labelling, previous constructs in both the original Brainbow  
136 and Brainbow2 series do not have antigen specificity (Cai *et al.*, 2013). To test fluorescent  
137 protein preservation, Axolotl Brainbow2.1R (Currie *et al.*, 2016) was crossed to CAGGs:ER-  
138 Cre-ER-T2A-EGFP-nuc (Khattak *et al.*, 2013) and recombination was induced followed by  
139 2Eci clearing. We found that all Brainbow fluorophores are preserved and remain spectrally  
140 distinct (Fig. S1D) suggesting that 2Eci can also be used as a general tool for already existing  
141 Brainbow and Brainbow2 without having to rely on antibody labelling. A complete overview  
142 of tested fluorophores is provided in Table 2. To further challenge 2Eci, we cleared adult

143 zebrafish, as they provide a unique challenge due to their size, scales and 3 types of pigment  
144 (xanthophores, melanophores, and iridophores). We found that while efficient clearing is  
145 achieved simply by increasing the time for dehydration and clearing steps (Fig. S2A-B) the  
146 silvery iridophores and black melanophores persist. Surprisingly the yellow xanthophores  
147 are efficiently cleared. The reason underlying this difference in pigment clearing is  
148 something we currently do not understand, but can be overcome using pigmentation  
149 mutants such as Nacre (Lister *et al.*, 1999) (Fig. S2C-D).

150

151 In the cerebral organoids, 2Eci surpassed FluoClearBABB in clearing effectiveness (Fig. 1B-C).  
152 We further investigated ethyl cinnamate as a viable clearing strategy after whole mount in-  
153 situ hybridization in amphibians, and in the context of adult *Drosophila melanogaster*. After  
154 WISH, amphibian embryos are commonly dehydrated using methanol and subsequently  
155 cleared using BABB (Saint-Jeannet, 2017). Adult *Drosophila melanogaster* were also  
156 previously shown to be efficiently cleared using BABB (McGurk *et al.*, 2007). We found Ethyl  
157 cinnamate to provide an efficient and non-toxic alternative in clearing of axolotl embryos  
158 after WISH (Fig. S1E). We thus expect embryos from other species that are also commonly  
159 cleared with BABB after WISH also to be efficiently cleared using Eci.

160

161 To test if adult *Drosophila melanogaster* can be cleared using Ethyl cinnamate, we used 2Eci  
162 to clear Krp:GFP transgenic drosophila. Prior to dehydration, we performed a CCD digest to  
163 digest parts of the exoskeleton and increase permeabilization (Manning and Doe, 2016). We  
164 found 2Eci to efficiently clear both larvae and adult drosophila (Fig. 3G-I), while preserving  
165 GFP expression (Fig. 3J-I). For adult drosophila, autofluorescence at 488 nm and 568 nm  
166 excitation was comparable. We therefore used the 568 nm channel to perform  
167 morphological reconstruction of drosophila and its inner organs and also subtract the auto-  
168 fluorescent background of the 488 nm recording to visualize a GFP-specific signal. With this,  
169 whole fly reconstructions are possible while retaining the cellular resolution of Krp-GFP cells  
170 (Fig. 3J and Movie 3).

171

## 172 **2Eci clearing can combine fluorescent proteins with antibody staining**

173 Comparison of fluorescent protein expression with traditional immunofluorescent antibody  
174 staining is a workhorse method for characterizing cell types in complex tissues such as the

175 limb. To interrogate if traditional two-step antibody labelling and fluorescence protein  
176 detection can be combined in 2Eci clearing, we used a combination of anti-Prrx1 antibody  
177 staining and Cre mediated lineage labelling in our transgenic *Col1a2:ER-Cre-ER; CAGGs:LP-*  
178 *GFP-LP-mCherry* reporter animals. Prrx1 is a broad marker of limb connective tissue while  
179 Col1a2 is a known marker of dermal fibroblasts and the skeletal lineage. Processing of limbs  
180 from the reporter transgenic showed that Col1a2-expressing cells localize to the skeletal,  
181 tendon and dermis. Antibody staining for PRRX1<sup>+</sup> labeled cells in dermis peri-skeleton cells,  
182 and muscle interstitium with low intensity signal in the skeletal lineage (Fig. 4). This  
183 experiment highlights the heterogeneous nature of connective tissue. More importantly it  
184 further highlights utility of this rapid clearing protocol for combining fluorescent protein  
185 with immunofluorescence visualization to analyze the complex 3D morphologies of  
186 heterogeneous tissues.

187

### 188 **Imaging considerations**

189 Since Ethyl cinnamate is a non-toxic compound as opposed to BABB it can be used on  
190 microscopes in multi-user microscope facilities. However, there is a current lack of  
191 commercially available lenses optimized for Ethyl cinnamate both with regard to refractive  
192 index matching and immersion compatibility. Such lenses would ideally be applied in the  
193 context of high resolution light sheet microscopy. We opted instead to optimize deployment  
194 on commonly available inverted imaging platforms using low magnification( $\leq 20\times$ ), low NA  
195 ( $< 0.8$ ) air objectives with long working distances. Such lenses provide a large field of view  
196 while reducing the effect of refractive index mismatching. This approach also prevents the  
197 lenses from coming into direct contact with Eci. While Eci is a non-toxic compound it is still a  
198 mild organic solvent and might attack insulation rings of objectives or imaging chambers.  
199 Thus, we set out to identify suitable commercially available mounting chambers for inverted  
200 imaging (table 3). From all the dishes that were tested, we identified the IBIDI  $\mu$ Dish 35mm  
201 ibiTreat (cat.#81156) and Ibidi 35mm Glass Bottom (cat.#81158) as compatible with Ethyl  
202 cinnamate, being resistant to Ethyl cinnamate for at least several months. However, we  
203 recommend to store samples in air tight containers such as Falcon tubes or VOA glass vials  
204 filled with Ethyl cinnamate, as prolonged exposure to the air can result oxidation and mild  
205 declearing over time (data not shown). Samples which are difficult to orientate can be  
206 fixated in place by mounting samples in a 1% phytigel block prior to dehydration. After

207 clearing phytigel blocks can be mounted directly into the microscope dish using a small  
208 amount of super glue. Taken together this mounting and imaging approach should provide a  
209 reliable method which can be easily deployed in high throughput approaches using multi-  
210 user microscope facilities

211

212 We conclude that 2Eci is a broadly applicable clearing method that combines the rapid and  
213 broad applicability of dehydration-based methods, and the non-toxic nature and  
214 preservation of fluorescent proteins of aqueous clearing methods. This method preserves  
215 both fluorescent proteins while being also compatible with antibody staining. 2Eci clearing  
216 was shown to be effective in a large range of cases either matching or surpassing the  
217 efficacy of BABB. 2Eci is a simple, robust and cost-effective clearing method which should  
218 see use in high-throughput organoid screening approaches, among others.

219

## 220 **Acknowledgements**

221 The authors acknowledge Francois Bonnay, Joshua Bagley, Tzi-Yang Lin, and Andrea Pauli for  
222 the contribution of tissues and cell lines, Tobias Müller for discussions, and the IMP  
223 BioOptics for availability and maintenance of microscopes.

224

## 225 **Competing interests**

226 The authors declare no competing interests.

227

## 228 **Funding**

229 WM is supported by a Lise Meitner fellowship (M2444); EMT is supported by ERC Advanced  
230 Grant, DFG grant TA 274/13-1, TA 274/3-3; JK is supported by the Austrian Academy of  
231 Sciences, the Austrian Science Fund (grants I\_1281-B19 and Z-153-B09) and an advanced  
232 grant from the European Research Council.



233 Figures

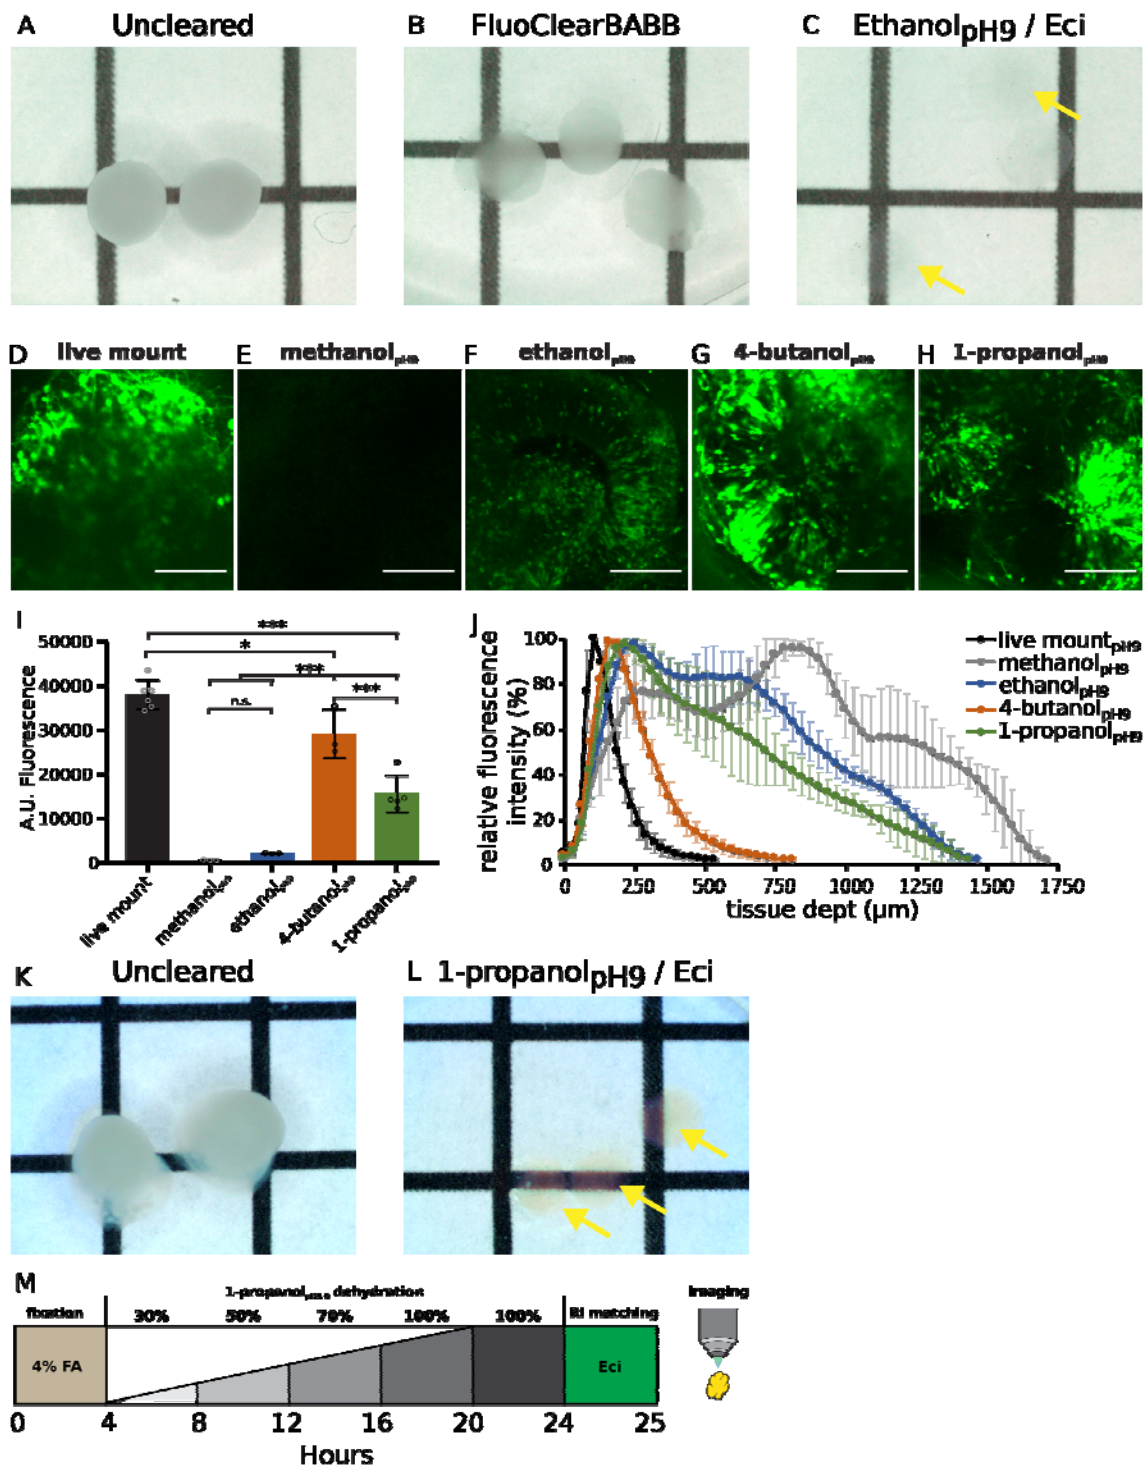

234

235 **Figure 1: Eci clearing optimizations in cerebral organoids**

236 Whole-mount recording of >100 day old cerebral organoids after fixation (A), FluoClearBABB

237 (B) and ethanol<sub>pH9</sub>/Eci clearing. Yellow arrows mark organoids, 2 independent repetitions

238 were performed. Dehydration agent dependent fluorescence after Eci mediated clearing (D-

239 I). Comparison of live mounted organoids (D) and dehydration series (30%, 50%, 70%, 2x  
240 100%, pH 9.0) of ethanol (E), methanol (F), 4-butanol (G) and 1-propanol (H) were  
241 performed on cerebral organoids and maximal fluorescence of Z stacks was quantified after  
242 Eci based clearing (I). N=3-6. Significance was calculated using ANOVA and post-hoc Turkey's  
243 test. Quantification of tissue auto-fluorescence through alcohol- Eci cleared organoids as a  
244 measure of clearing efficiency (J). Uncleared organoids (K), are efficiently cleared (L) in as  
245 little as 25 hours including fixation, dehydration/delipidation, and refractive index matching.  
246 Scale bars: D-H 100  $\mu$ m. Grid size A-C, K, L 5 mm.

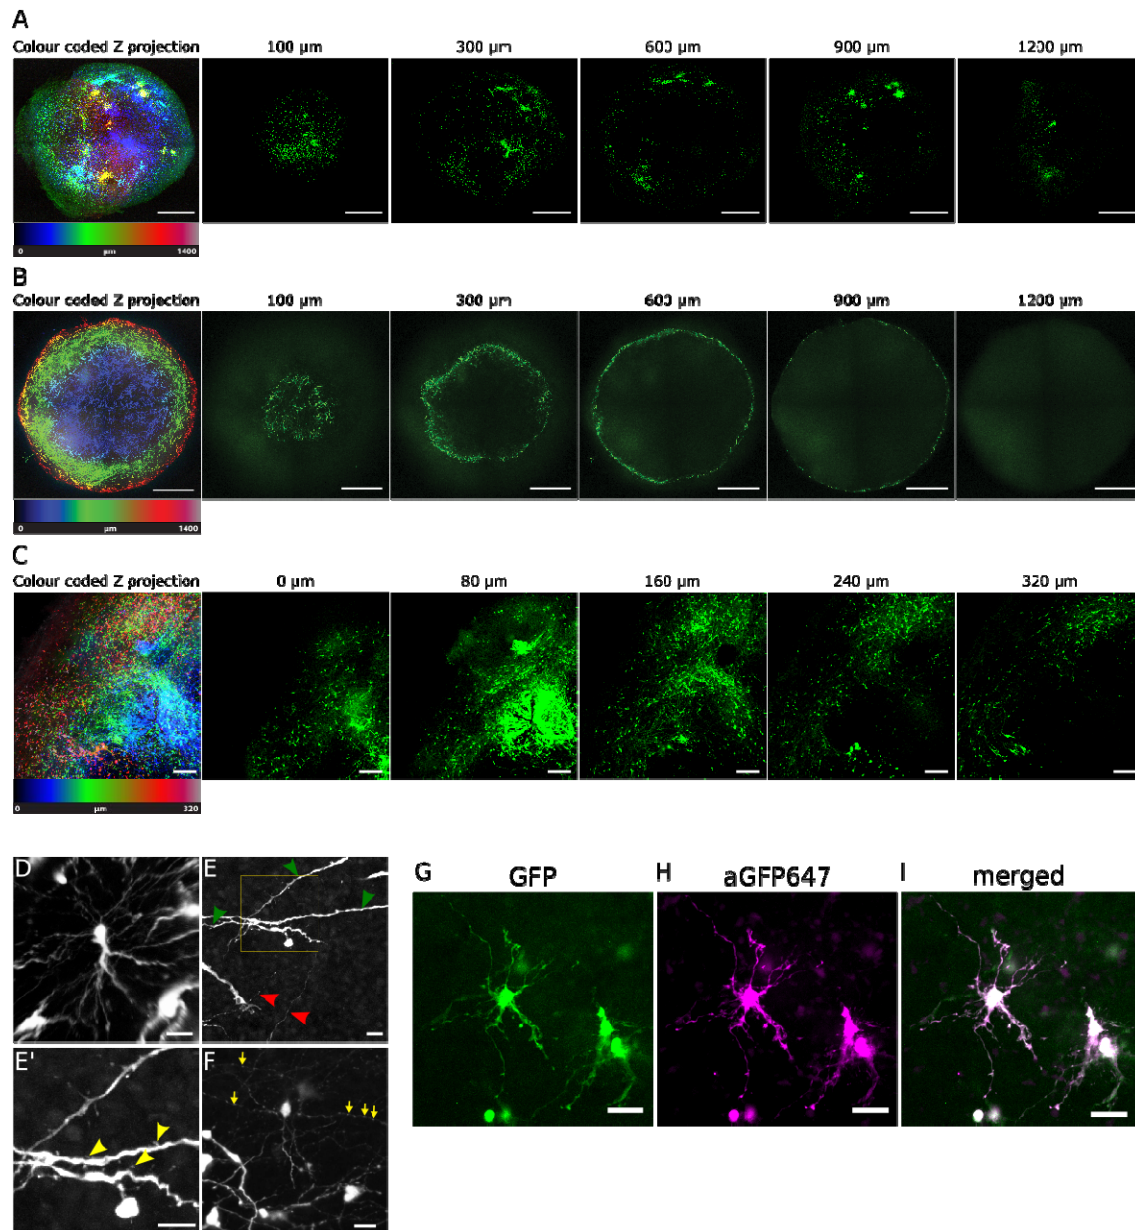

247

248 **Figure 2: Characterization of 2Eci clearing.** (A, B) Colour coded Z-projection and  
249 representative Z-slices of both 2Eci cleared (A) and uncleared (B) 3% GFP<sup>+</sup> 80 day old  
250 cerebral organoids. 2Eci allows imaging through whole organoids. Spots of color aggregation  
251 depict aggregations of GFP<sup>+</sup> neuronal stem cells in neuronal rosettes, whereas more mature  
252 neurons distribute more equally throughout the organoid. (C) Detailed morphology can be  
253 observed, including neuronal rosettes and more mature neurons in a day 90 old cerebral  
254 organoid. (D-F) 3D reconstruction of multiple neurons in 80 day old cerebral organoids. (D)  
255 Cellular details such as cell body shape and neurites can be observed using 20x objectives  
256 and 2x lens switch. (E) Putative dendrites (green arrowheads) and axons (red arrowheads)

257 are maintained after clearing. (E') Magnified view (yellow box) reveals putative dendritic  
258 spines (yellow arrowheads). (F) putative Boutons (yellow arrows) can be identified (G-I)  
259  $\alpha$ GFP647 accurately labels GFP fluorescence in single neurons. Scale bars: A-C 500  $\mu$ m, D-F  
260 10  $\mu$ m, G-I 20  $\mu$ m.

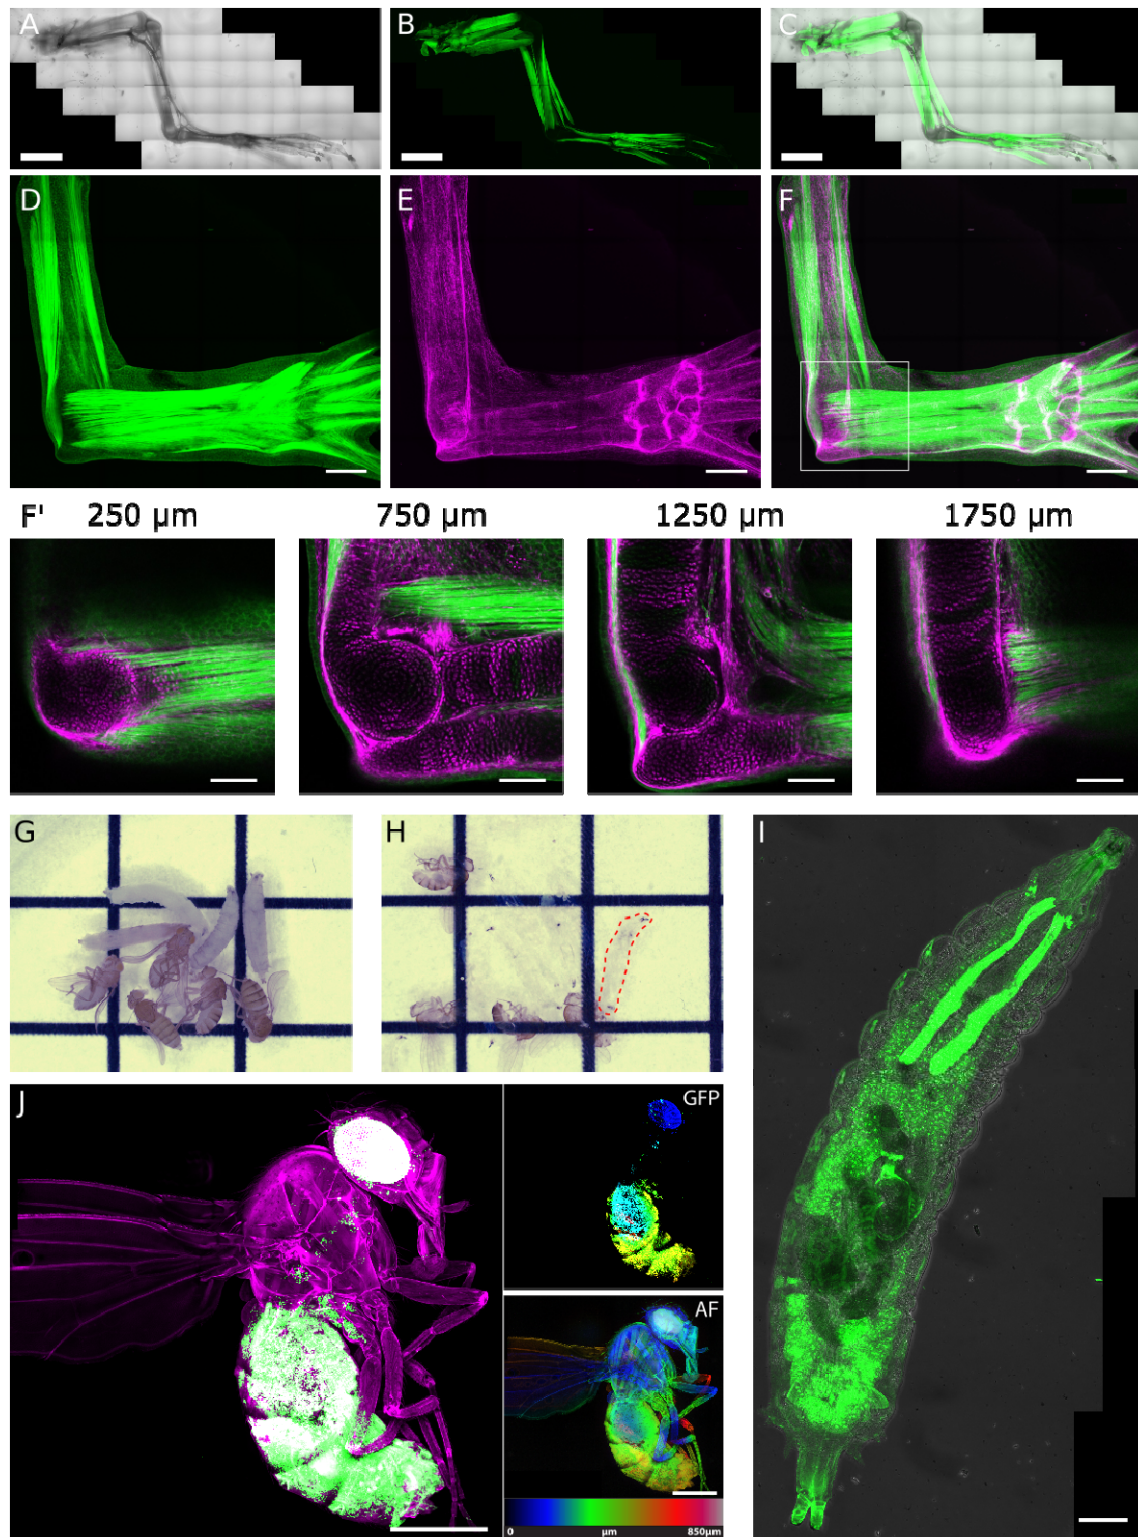

261

262

263

264

**Figure 3: A large variety of tissues and animals are efficiently cleared using 2Eci while preserving signal. (A-C) CAG-GFP *Xenopus laevis* hind limbs are efficiently cleared using 2Eci. (A) brightfield imaged of cleared *Xenopus laevis* hind limb, (B) GFP is especially**

265 prevalent in the musculature, (C) merged view. (D-F) Both GFP (D, green), and mCherry (E,  
266 magenta) fluorescence is preserved after 2Eci clearing of Prrx1:ER-Cre-ER CAGGs:LP-GFP-LP-  
267 mCherry double transgenic axolotl. Detailed morphology can be observed throughout the  
268 limb (F') including loose connective tissue, skeletal elements and tendons. (G-H) Drosophila  
269 larvae and adult drosophila before and after 2Eci clearing. Red dashed outline: indication of  
270 one of eight cleared drosophila larvae in the image (H). (I) Maximum intensity projection of  
271 a Krp-GFP drosophila larvae. Krp-GFP<sup>+</sup> salivary gland and fat tissue can be observed  
272 throughout the larvae. (J) Whole Krp-GFP drosophila virgin z-Projection. Green represents  
273 GFP fluorescence, magenta represents autofluorescence. Right panels: Color coded z-  
274 projections of both GFP and 568nm autofluorescence (AF). Scale bars: A-C 2 mm, D-F 500  
275  $\mu\text{m}$ , F' 200  $\mu\text{m}$ : I-J 500  $\mu\text{m}$ . Grid size G-H: 5 mm.  
276

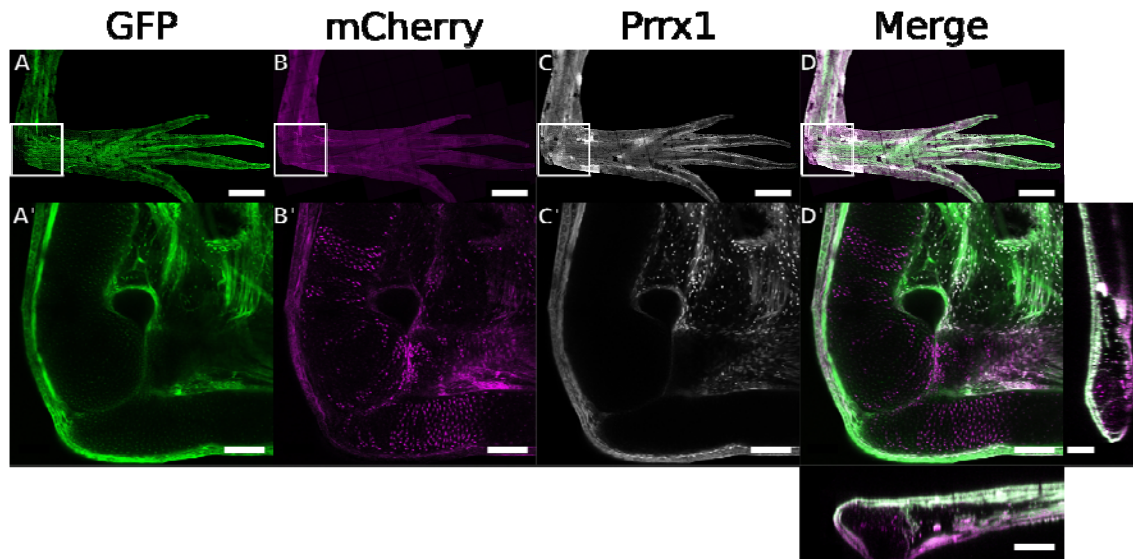

277

278 **Figure 4: Heterogeneous nature of connective tissue as revealed by combining**  
279 **fluorophores and antibody staining in 2Eci cleared axolotl limbs.** Upon Cre activity GFP<sup>+</sup>  
280 cells (A), convert to an indelible mCherry<sup>+</sup> labelling (B). Antibody staining (C) can be  
281 effectively combined with this resulting in a 3-channel image which highlights the complex  
282 heterogeneous nature of connective tissue (D). A-D are maximum intensity projections of  
283 the entire limb. The bounding box marks the elbow. Single slice recordings of the elbow are  
284 shown in A'-D', D' includes orthogonal views of the z-stack. Scale bars: A-D 1000  $\mu\text{m}$ , A'-D'  
285 250  $\mu\text{m}$ .

286 Tables

287 Table1: overview of various commonly used clearing methods.

| Method                  | Aqueous/Organic | Timescale | Toxicity? | Clearing | GFP preservation | reference                        |
|-------------------------|-----------------|-----------|-----------|----------|------------------|----------------------------------|
| SeeDB                   | A               | 3 days    | no        | ++       | ++++             | (Ke, Fujimoto and Imai, 2013)    |
| Clarity                 | A               | 8 days    | no        | +++      | ++++             | (Chung <i>et al.</i> , 2013)     |
| FluoBABB                | O               | >2 days   | yes       | ++       | +++              | (Schwarz <i>et al.</i> , 2015)   |
| Eci/ETOH                | O               | >5 days   | no        | +++      | +                | (Klingberg <i>et al.</i> , 2017) |
| Eci/Prop <sub>pH9</sub> | O               | 25 hours  | no        | +++      | +++              | Current manuscript               |

288



289 Table 2:

290 Overview of fluorescent probes or fluorophores compatibility with 2Eci clearing.

|                                |                                                    |
|--------------------------------|----------------------------------------------------|
| GFP (and related fluorophores) | Strong                                             |
| mCherry                        | Strong                                             |
| tdTomato                       | Average                                            |
| Alexa fluorophores             | Strong                                             |
| DAPI                           | Strong                                             |
| Abberior                       | Strong (Abberior Star 635P)                        |
| Cy fluorophores                | Expected to be weak (Schwarz <i>et al.</i> , 2015) |

291

292 Table 3:

293 Overview of imaging dishes tested for compatibility with 2Eci clearing.

|                                                                     |                                                 |
|---------------------------------------------------------------------|-------------------------------------------------|
| Ibidi $\mu$ Slide uncoated                                          | Bottom falls out instantly (< 10 minutes)       |
| Ibidi $\mu$ Slide ibiTreat                                          | Bottom falls out instantly (< 10 minutes)       |
| <b>Ibidi <math>\mu</math>Dish 35 mm high ibiTreat (81156)</b>       | <b>Long term storage possible (&gt;2 month)</b> |
| <b>Ibidi <math>\mu</math>Dish 35mm high, Glass Bottom (81158)</b>   | <b>Long term storage possible (&gt;2 month)</b> |
| Ibidi $\mu$ Dish 35 mm high uncoated (81151)                        | Single recordings, gradually dissolves plastic  |
| NUNC Lab-Tek (155361)                                               | Single recordings, gradually dissolves plastic  |
| NUNC Lab-Tek II (154453)                                            | Single recordings, gradually dissolves plastic  |
| Univer-slide (Alessandri <i>et al.</i> , 2017)                      | Long term storage possible                      |
| Lab-Tek II Chambered #1.5 Coverglass System (155409) 8 well chamber | Single recordings, gradually dissolves plastic  |
| Lab-Tek II Chambered Coverglass System (154941) 8 well chamber      | Single recordings, gradually dissolves plastic  |
| Lab Tek chambered borsilicate coverglas 4 chamber (155383)          | Single recordings, gradually dissolves plastic  |
| Sarstedt 4-well auf Lumox detachable (94.6150.401)                  | Single recordings, gradually dissolves plastic  |

294

295 **Movies**

296 Movie 1

297 3D reconstruction of a 2Eci cleared 80-day old CAG-GFP cerebral organoid.

298

299 Movie 2

300 3D reconstruction of a 2Eci cleared *Xenopus laevis* CAG-GFP hind limb.

301

302 Movie 3

303 3D reconstruction of a 2Eci cleared Krp-GFP adult *Drosophila melanogaster*. Magenta labels

304 auto-fluorescence, green marks Krp-GFP expression.

305 Materials and Methods

306

307 Growth of cerebral organoids

308 Organoids have been grown as described previously(Lancaster *et al.*, 2013) using feeder free  
309 H9 human embryonic stem cells (hES) from WiCell with a verified normal karyotype and  
310 contamination free. Cells were cultured in mTESR1 (Cat.85850) and initial EB formation  
311 for the first 5 days was performed in mTESR1. For sparse labeling of organoids, 1-3% of the  
312 initial 9000 cells were replaced with feeder free H9 with a CAG-GFP insertion into AAVS1  
313 (Bagley *et al.*, 2017) for initial EB formation.

314

315 Animal husbandry and handling

316 Axolotl were maintained on a 12-h light/ 12-h dark cycle at 18-20°C(Khattak *et al.*, 2014).  
317 Prior to amputation or tissue collection animals were anaesthetized in 0.03 % benzocaine  
318 and injected subcutaneously with 38mg/Kg buprenorphine. 0.1% benzocaine was used for  
319 terminal experiments and euthanasia of axolotl. The work was performed under an  
320 approved license from the Magistrat der Stadt Wien (GZ: 9418/2017/12).

321

322 TLAB and Nacre(Lister *et al.*, 1999) zebrafish were maintained on a 14-h light/ 10-h dark  
323 cycle at 28°C according to standard procedures(Westerfield, 1995). TLAB fish, generated by  
324 crossing zebrafish AB and the natural variant TL (Tübingen/Tüpfel Longfin) stocks, served as  
325 wild-type zebrafish. All fish experiments were conducted according to Austrian and  
326 European guidelines for animal research and approved by local Austrian authorities (animal  
327 protocol BMGF-76110/0017-II/B/16c/2017).

328

329 *Xenopus* were maintained on a 12-h light/ 12-h dark cycle at 20°C. Prior to amputation or  
330 tissue collection animals were anaesthetized in 0.01% MS222 and injected subcutaneously  
331 with 38mg/Kg buprenorphine. The work is performed under an approved license from the  
332 Magistrat der Stadt Wien (GZ: 852533/2016/20).

333

334 The following *Drosophila melanogaster* stock was used in this study:

335 w; L<sup>2</sup> Pin<sup>1</sup>/CyO, P{GAL4-Kr.C}DC3, P{UAS-GFP.S65T}DC7 (Bloomington #5194),

336 a larval fat-body-expressing GFP reporter. Wandering third instar larvae and young virgin  
337 females still displaying larval fat-body were used as material for clearing.

338

339 Clearing of cerebral organoids

340 Organoids were fixed in 4% PFA for 4h at RT or at 4°C over night and transferred  
341 sequentially into a dehydration series of 30%, 50%, 70% and 2x 100% 1-Propanol (99%;  
342 Sigma Cat. W292818, 99.7%: Sigma Cat. 27944): 1xPBS solution pH adjusted to 9.0 – 9.5  
343 using trimethylamine (Sigma Cat. T0886). For comparison of dehydration agents, 1-Propanol  
344 was exchanged with 4-Butanol, Ethanol or Methanol respectively. Dehydration was  
345 performed at 4°C on a gyratory rocker for at least 4h per dehydration step in 50ml Falcon  
346 tubes containing 45ml dehydration agent.

347 Subsequently, organoids were transferred in a 50ml tube with at least 25ml ECi (≥98%:  
348 Sigma Cat. W243000, 99%: Sigma Cat. 112372) and incubated on a gyratory rocker at room  
349 temperature for at least one hour before recording. Samples were stored in light-protected  
350 and air-sealed containers. Recordings were acquired over the following days.

351

352 IHC of cerebral organoids

353 IHC was optionally performed after 4% PFA fixation. In brief, organoids were washed in PBS  
354 for 10min to remove residual PFA. Subsequently, the organoids were transferred in  
355 permeabilization/blocking solution (0.3% TX100, 5% BSA, 0.05% NaN<sub>3</sub> in PBS) over night.  
356 For antibody staining, a GFP booster in far red (Atto647, Chromotek GBA647n) at 1:50  
357 dilution was used in antibody staining solution (0.1%TX100, 5%BSA, 0.05% NaN<sub>3</sub>). IHC was  
358 performed at 37°C for 2 days. Subsequently, organoids were washed in PBS-T (PBS and 0.1%  
359 TX100) for one day. The organoids were then fixed in 4% PFA and used for clearing as  
360 described.

361

362 Clearing and recording of drosophila

363 Drosophila and drosophila larvae were used for clearing experiments. Drosophila were  
364 transferred into 30% EtOH to remove the hydrophobic fatty lipid layer from the exoskeleton  
365 for 5-10 minutes. Subsequently, drosophila were briefly bleached using DanKlorix, a  
366 commercially available bleach solution (Colgate-Palmolive). To increase transparency of the  
367 exoskeleton, a CCD (Chitinase-chymotrypsin-DMSO buffer) digest was performed(Manning

368 and Doe, 2016). *Drosophila* were then subsequently fixed in 4% PFA in PBS for 4h at RT or at  
369 4°C over night. Clearing was performed as for cerebral organoids, however the incubation in  
370 Ethyl cinnamate was extended to 3+ hours. For adult fly recordings, the GFP fluorescence  
371 (488nm excitation, Filter: 525/50) as well as the autofluorescence of 561nm (561nm  
372 excitation, Filter: 609/54) was recorded and the autofluorescence of the 561 channel was  
373 subtracted from the GFP recording. To ensure autofluorescence specificity in the  
374 subtraction process, the 562 channel was recorded with autofluorescence intensity levels  
375 below the levels of GFP autofluorescence. Alternatively, the intensity of the 561 channel  
376 was modulated to achieve levels slightly below GFP autofluorescence levels. We did not find  
377 significant differences between both 488nm/525 and 561nm/609 autofluorescence.  
378 Additionally to autofluorescence correction, the 561/609 recording was used to reconstruct  
379 morphological details of adult *Drosophila*.

380

381 Clearing of axolotl tissue

382 Axolotl tissue was harvested as previously described (Roensch *et al.*, 2013), briefly axolotl  
383 tissue fixed at 4°C over night in 1x MEMFA (0.1M MOPS pH 7.4, 2mM EGTA, 1mM Mg SO<sub>4</sub> x  
384 7H<sub>2</sub>O and 3.7% formaldehyde), washed in PBS and cleared as for cerebral organoids,  
385 however dehydration and Ethyl cinnamate incubation steps were increased to 12 hours.

386

387 IHC of whole mount axolotl tissue

388 IHC was performed optionally after MEMFA fixation. Tissue was washed in PBS at RT for 2x 1  
389 hour, followed by a 3x 2 hour PBS-T (0.3% triton) wash. Blocking was performed at 37°C  
390 overnight in PBS-T supplemented with 5% bovine serum. Staining was performed at 37°C for  
391 48 hours in PBS-T supplemented with 5% bovine serum and axolotl prrx1 antibody (Ocaña *et al.*,  
392 2017). Tissue was again washed and blocked, followed by staining for secondary  
393 antibody. Tissue was extensively washed in PBS after staining and processed for clearing.

394

395 Transgenesis and lineage tracing in axolotl

396 To label connective tissue populations in axolotl the newly generated lines of Col1a2:ER-  
397 Cre-ER, and Prrx1:ER-Cre-ER were onto the already existing CAGGs:LP-EGFP-LP-  
398 mCherry (Khattak *et al.*, 2013). To generate the Prrx1 and Col1a2 lines, the Prrx1  
399 enhancer/promoter (Logan *et al.*, 2002) (a kind gift from Malcolm Logan) and the Col1A2

400 promoter(Bou-Gharios *et al.*, 1996) (a kind gift from George Bou-Gharios) was cloned at  
401 the 5' end of TFPnls-T2A-ERT2-Cre-ERT2 (ER-Cre-ER) cassette with flanking Scel sites.  
402 Transgenesis was performed as previously described(Khattak *et al.*, 2014). 4-OHT treatment  
403 is done as described previously(Khattak *et al.*, 2014). Briefly, 3 cm long double transgenic  
404 animals were treated with 2  $\mu$ M 4-Hydroxy Tamoxifen (4-OHT) by bathing over night. Tissue  
405 was collected 2 weeks post treatment.

406

407 Whole mount In-situ hybridizations of axolotl  
408 Chromogenic in-situ hybridizations were performed as previously described (Cerny *et al.*,  
409 2004) using stage 35 axolotl. Probes for GFAP(Rodrigo Albors *et al.*, 2015) were generated as  
410 previously described. After staining and dehydration axolotl embryos were incubated 15-30  
411 minutes in 98% Ethyl Cinnamate to clear the tissue.

412

413 Zebrafish fixation and clearing

414 Zebrafish were collected and fixed in 4% PFA using standard procedures(Westerfield, 1995).  
415 Clearing was performed as described for organoids however dehydration and ethyl  
416 cinnamate incubation steps were increased to 12 hours. Additionally, the swim bladder was  
417 pierced and allowed to fill with ethyl cinnamate.

418

419 Xenopus fixation and clearing

420 Xenopus hind limbs were collected as for axolotl. The pigmented skin was carefully removed  
421 from the hind limbs using forceps. Hind limbs were cleared as described for cerebral  
422 organoids however dehydration and ethyl cinnamate incubation steps were increased to 12  
423 hours.

424

425 Microscopy

426 Organoid and drosophila recordings were performed on a Yokogawa W1 spinning disk  
427 confocal microscope (VisiScope, Visitron Systems GmbH, Puchheim, Germany) controlled  
428 with VisiView Software (Visitron) and mounted on the Eclipse Ti-E microscope (Nikon, Nikon  
429 Instruments BV). Recordings were performed with a 10x/0.45 CFI plan Apo Lambda,  
430 20x/0.75 CFI plan Apo lambda or CFI plan Apo lambda 40x/1.4 oil (all: Nikon, Nikon  
431 Instruments BV) objectives with a sCMOS camera (PCO edge 4.2m, PCO AG) or an EMCCD

432 camera (Andor Ixon Ultra 888). For stitching, the stitching plugin in Fiji (based on ImageJ  
433 1.51k) was used. For 3D reconstructions, the freeware Icy (Version 1.9.5.1) was used.  
434 Axolotl and Xenopus recordings were collected on an inverted Zeiss LSM780 equipped with  
435 a 10x/0.3 EC plan-neofluar objective (Carl Zeiss Microscopy GmbH, Germany). Zen 2.3 SP1(  
436 black) (64 bit) was used for image acquisition and automatic stitching of images. Image  
437 preparation was performed using FIJI (based on ImageJ 1.51k) and Inkscape 0.91  
438 ([www.inkscape.org](http://www.inkscape.org)). Adult zebrafish and intact axolotl recordings were acquired using a  
439 Zeiss Lumar stereomicroscope (Carl Zeiss Microscopy GmbH, Germany) equipped with Spot  
440 Pursuit-XS monochrome and Spot Insight color cameras (SPOT Imaging USA).

441

442 Statistics

443 One way-ANOVA and post-hoc Tukey's test were performed to determine significance  
444 between groups.

445

446

447 References:

448 **Alessandri, K., Andrique, L., Feyeux, M., Bikfalvi, A., Nassoy, P. and Recher, G.** (2017) 'All-  
449 in-one 3D printed microscopy chamber for multidimensional imaging, the UniverSlide.',  
450 *Scientific reports*, **7**, p. 42378. doi: 10.1038/srep42378.

451 **Bagley, J. A., Reumann, D., Bian, S., Lévi-Strauss, J. and Knoblich, J. A.** (2017) 'Fused  
452 cerebral organoids model interactions between brain regions', *Nature Methods*, **14(7)**, pp.  
453 743–751. doi: 10.1038/nmeth.4304.

454 **Belle, M., Godefroy, D., Couly, G., Malone, S. A., Collier, F., Giacobini, P. and Chédotal, A.**  
455 (2017) 'Tridimensional Visualization and Analysis of Early Human Development.', *Cell*,  
456 **169(1)**, pp. 161–173.e12. doi: 10.1016/j.cell.2017.03.008.

457 **Belle, M., Godefroy, D., Dominici, C., Heitz-Marchaland, C., Zelina, P., Hellal, F., Bradke, F.**  
458 **and Chédotal, A.** (2014) 'A simple method for 3D analysis of immunolabeled axonal tracts in  
459 a transparent nervous system.', *CellReports*, **9(4)**, pp. 1191–1201. doi:  
460 10.1016/j.celrep.2014.10.037.

461 **Bou-Gharios, G., Garret, L. A., Rossert, J., Niederreither, K., Eberspaecher, H., Smith, C.,**  
462 **Black, C. and de Crombrughe, B.** (1996) 'A potent far-upstream enhancer in the mouse pro  
463 alpha 2(I) collagen gene regulates expression of reporter genes in transgenic mice', *The*  
464 *Journal of Cell Biology*, **134(5)**, pp. 1333–1344. doi: 10.1083/jcb.134.5.1333.

465 **Cai, D., Cohen, K. B., Luo, T., Lichtman, J. W. and Sanes, J. R.** (2013) 'Improved tools for the  
466 Brainbow toolbox.', *Nature Methods*, **10(6)**, pp. 540–547. doi: 10.1038/nmeth.2450.



- 467 **Cerny, R., Lwigale, P., Ericsson, R., Meulemans, D., Epperlein, H. H. and Bronner-Fraser, M.**  
468 (2004) 'Developmental origins and evolution of jaws: new interpretation of "maxillary" and  
469 "mandibular".'. *Developmental Biology*, **276(1)**, pp. 225–236. doi:  
470 10.1016/j.ydbio.2004.08.046.
- 471 **Chung, K., Wallace, J., Kim, S.-Y., Kalyanasundaram, S., Andalman, A. S., Davidson, T. J.,**  
472 **Mirzabekov, J. J., Zalocusky, K. A., Mattis, J., Denisin, A. K., Pak, S., Bernstein, H.,**  
473 **Ramakrishnan, C., Grosenick, L., Gradinaru, V. and Deisseroth, K.** (2013) 'Structural and  
474 molecular interrogation of intact biological systems', *Nature*. Nature Publishing Group,  
475 **497(7449)**, pp. 332–337. doi: 10.1038/nature12107.
- 476 **Currie, J. D., Kawaguchi, A., Traspas, R. M., Schuez, M., Chara, O. and Tanaka, E. M.** (2016)  
477 'Live Imaging of Axolotl Digit Regeneration Reveals Spatiotemporal Choreography of Diverse  
478 Connective Tissue Progenitor Pools.', *Developmental Cell*, **39(4)**, pp. 411–423. doi:  
479 10.1016/j.devcel.2016.10.013.
- 480 **Economo, M. N., Clack, N. G., Lavis, L. D., Gerfen, C. R., Svoboda, K., Myers, E. W. and**  
481 **Chandrashekar, J.** (2016) 'A platform for brain-wide imaging and reconstruction of  
482 individual neurons'. eLife Sciences Publications Limited, **5**, p. e10566. doi:  
483 10.7554/eLife.10566.
- 484 **Ertürk, A., Becker, K., Jährling, N., Mauch, C. P., Hojer, C. D., Egen, J. G., Hellal, F., Bradke,**  
485 **F., Sheng, M. and Dodt, H.-U.** (2012) 'Three-dimensional imaging of solvent-cleared organs  
486 using 3DISCO.', *Nature Protocols*. Nature Publishing Group, **7(11)**, pp. 1983–1995. doi:  
487 10.1038/nprot.2012.119.
- 488 **Ke, M.-T., Fujimoto, S. and Imai, T.** (2013) 'SeeDB: a simple and morphology-preserving  
489 optical clearing agent for neuronal circuit reconstruction', *Nature Neuroscience*. Nature  
490 Publishing Group, **16(8)**, pp. 1154–1161. doi: 10.1038/nn.3447.
- 491 **Khattak, S., Murawala, P., Andreas, H., Kappert, V., Schuez, M., Sandoval-Guzmán, T.,**  
492 **Crawford, K. and Tanaka, E. M.** (2014) 'Optimized axolotl (*Ambystoma mexicanum*)  
493 husbandry, breeding, metamorphosis, transgenesis and tamoxifen-mediated  
494 recombination.', *Nature Protocols*, **9(3)**, pp. 529–540. doi: 10.1038/nprot.2014.040.
- 495 **Khattak, S., Schuez, M., Richter, T., Knapp, D., Haigo, S. L., Sandoval-Guzmán, T.,**  
496 **Hradlikova, K., Duemmler, A., Kerney, R. and Tanaka, E. M.** (2013) 'Germline transgenic  
497 methods for tracking cells and testing gene function during regeneration in the axolotl.',  
498 *Stem cell reports*, **1(1)**, pp. 90–103. doi: 10.1016/j.stemcr.2013.03.002.
- 499 **Klingberg, A., Hasenberg, A., Ludwig-Portugall, I., Medyukhina, A., Männ, L., Brenzel, A.,**  
500 **Engel, D. R., Figge, M. T., Kurts, C. and Gunzer, M.** (2017) 'Fully Automated Evaluation of  
501 Total Glomerular Number and Capillary Tuft Size in Nephritic Kidneys Using Lightsheet  
502 Microscopy.', *Journal of the American Society of Nephrology : JASN*. American Society of  
503 Nephrology, **28(2)**, pp. 452–459. doi: 10.1681/ASN.2016020232.
- 504 **Lancaster, M. A., Renner, M., Martin, C.-A., Wenzel, D., Bicknell, L. S., Hurles, M. E.,**  
505 **Homfray, T., Penninger, J. M., Jackson, A. P. and Knoblich, J. A.** (2013) 'Cerebral organoids

- 506 model human brain development and microcephaly.', *Nature*. Nature Publishing Group,  
507 **501(7467)**, pp. 373–379. doi: 10.1038/nature12517.
- 508 **Lister, J. A., Robertson, C. P., Lepage, T., Johnson, S. L. and Raible, D. W.** (1999) 'nacre  
509 encodes a zebrafish microphthalmia-related protein that regulates neural-crest-derived  
510 pigment cell fate', *Development (Cambridge, England)*, **126(17)**, pp. 3757–3767. doi:  
511 10.1074/jbc.273.31.19560.
- 512 **Logan, M., Martin, J. F., Nagy, A., Lobe, C., Olson, E. N. and Tabin, C. J.** (2002) 'Expression  
513 of Cre recombinase in the developing mouse limb bud driven by aPrxl enhancer', *genesis*,  
514 **33(2)**, pp. 77–80. doi: 10.1002/gene.10092.
- 515 **Manning, L. and Doe, C. Q.** (2016) 'Immunofluorescent antibody staining of intact  
516 *Drosophila* larvae', *Nature Protocols*, **12(1)**, pp. 1–14. doi: 10.1038/nprot.2016.162.
- 517 **McGurk, L., Morrison, H., Keegan, L. P., Sharpe, J. and O'Connell, M. A.** (2007) 'Three-  
518 Dimensional Imaging of *Drosophila melanogaster*', *PLoS ONE*. Edited by S. Rutherford, **2(9)**,  
519 pp. e834–6. doi: 10.1371/journal.pone.0000834.
- 520 **Ocaña, O. H., Coskun, H., Minguillón, C., Murawala, P., Tanaka, E. M., Galcerán, J., Muñoz-  
521 Chápuli, R. and Nieto, M. A.** (2017) 'A right-handed signalling pathway drives heart looping  
522 in vertebrates.', *Nature*. Nature Publishing Group, **549(7670)**, pp. 86–90. doi:  
523 10.1038/nature23454.
- 524 **Rodrigo Albors, A., Tazaki, A., Rost, F., Nowoshilow, S., Chara, O. and Tanaka, E. M.** (2015)  
525 'Planar cell polarity-mediated induction of neural stem cell expansion during axolotl spinal  
526 cord regeneration.', **4**, p. e10230. doi: 10.7554/eLife.10230.
- 527 **Roensch, K., Tazaki, A., Chara, O. and Tanaka, E. M.** (2013) 'Progressive Specification Rather  
528 than Intercalation of Segments During Limb Regeneration', *Science*, **342(6164)**, pp. 1375–  
529 1379. doi: 10.1126/science.1241796.
- 530 **Saint-Jeannet, J.-P.** (2017) 'Whole-Mount In Situ Hybridization of *Xenopus* Embryos.', *Cold  
531 Spring Harbor Protocols*, **2017(12)**, p. pdb.prot097287. doi: 10.1101/pdb.prot097287.
- 532 **Schwarz, M. K., Scherbarth, A., Sprengel, R., Engelhardt, J., Theer, P. and Giese, G.** (2015)  
533 'Fluorescent-protein stabilization and high-resolution imaging of cleared, intact mouse  
534 brains.', *PLoS ONE*, **10(5)**, p. e0124650. doi: 10.1371/journal.pone.0124650.
- 535 **Westerfield, M.** (1995) *The zebrafish book: a guide for the laboratory use of zebrafish*  
536 (*Brachydanio rerio*).
